# Supplementary material for: Cyclic two-step electrolysis for stable electrochemical conversion of carbon dioxide to formate
Source: PubMed Central journal article supplement (PMC6718411; doi:10.1038/s41467-019-11903-5), 2019-09-02
Supplement: 41467_2019_11903_MOESM1_ESM.pdf [file 41467_2019_11903_MOESM1_ESM.pdf]

Supplementary Information

**Cyclic two-step electrolysis for stable electrochemical conversion  
of carbon dioxide to formate**

Lee and Cho *et al.*

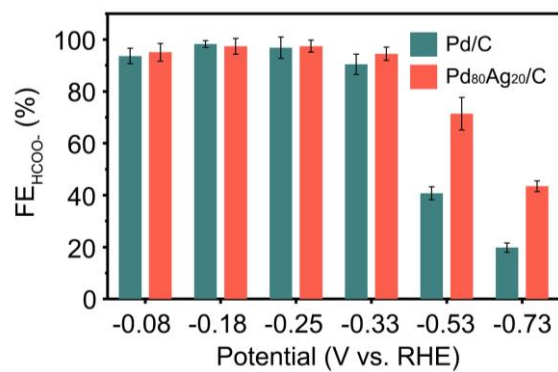

**Supplementary Figure 1** The FEs for HCOO<sup>-</sup> production measured at various potentials on the Pd/C and Pd<sub>80</sub>Ag<sub>20</sub>/C catalysts. Liquid product was analyzed using <sup>1</sup>H NMR after electrolysis at various potentials in a gas-tight cell. Error bars: mean±s.d. Source data are provided as a Source Data file.

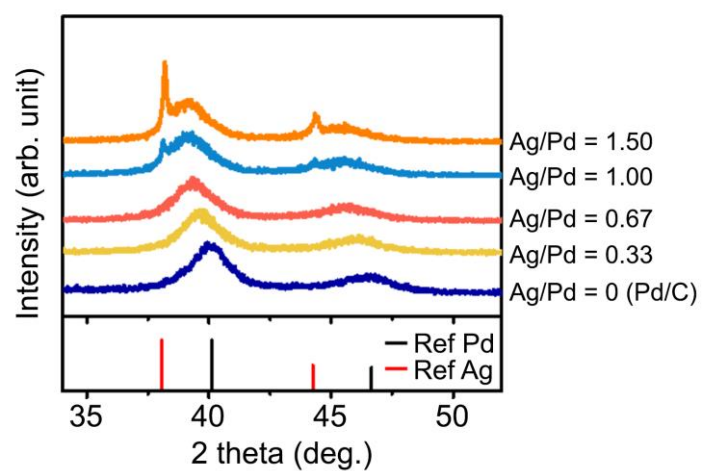

**Supplementary Figure 2** XRD patterns of the powders synthesized with different molar ratios of Ag/Pd through the microwave-assisted polyol method. When the input ratio of Ag/Pd was 0.67, the XRD pattern showed the largest peak shift without the formation of pure Ag crystals.

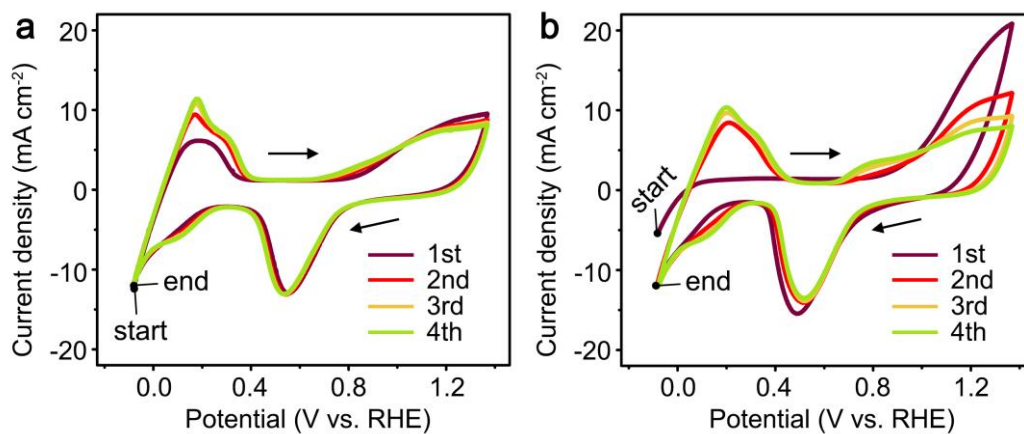

**Supplementary Figure 3** CV pretreatment of as-synthesized NPs. The CV spectra of **a** Pd/C and **b** Pd<sub>80</sub>Ag<sub>20</sub>/C were scanned at a scan rate of 50 mV s<sup>-1</sup> in Ar-purged 0.1 M HClO<sub>4</sub> solution for 4 cycles. For as-synthesized Pd<sub>80</sub>Ag<sub>20</sub>/C NPs, an irreversible oxidation peak at approximately 1.2 V vs. RHE was observed due to anodic dissolution of excessive Ag from the as-synthesized alloy.

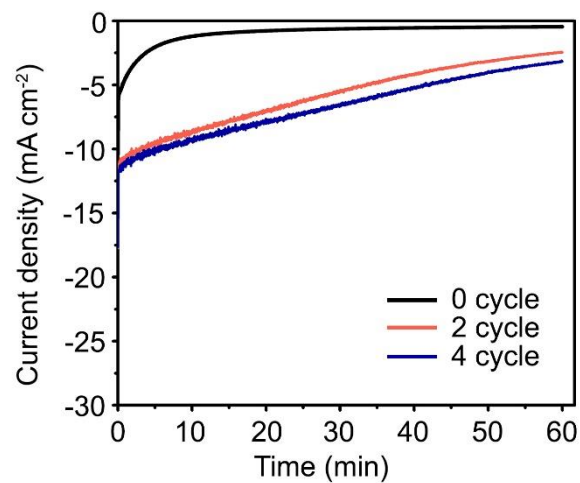

**Supplementary Figure 4** Current density vs. time curve of Pd<sub>80</sub>Ag<sub>20</sub>/C catalysts prepared with different cycle numbers of CV pretreatment. Chronoamperometry was conducted at -0.18 V vs. RHE in CO<sub>2</sub>-saturated 0.5 M NaHCO<sub>3</sub>/NaClO<sub>4</sub> solution.

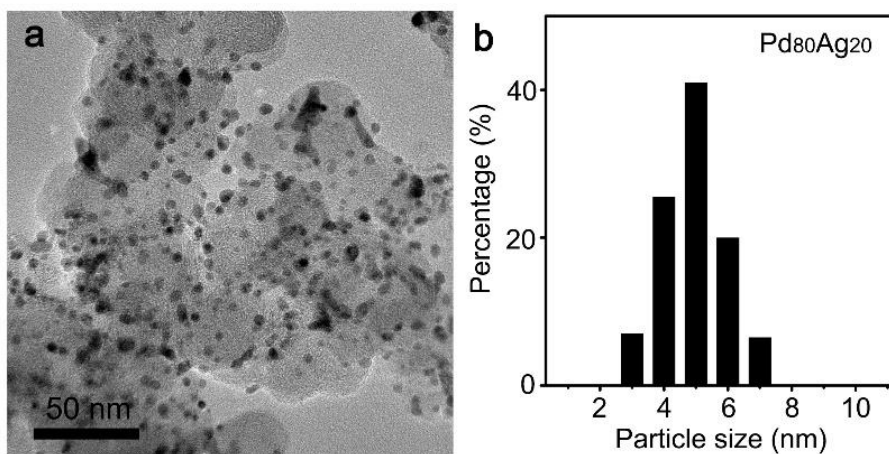

**Supplementary Figure 5** TEM analysis results. **a** TEM image and **b** particle size distribution of Pd<sub>80</sub>Ag<sub>20</sub>/C catalysts taken after CV pretreatment. The average particle size of the Pd<sub>80</sub>Ag<sub>20</sub>/C catalysts was approximately 5.0 nm.

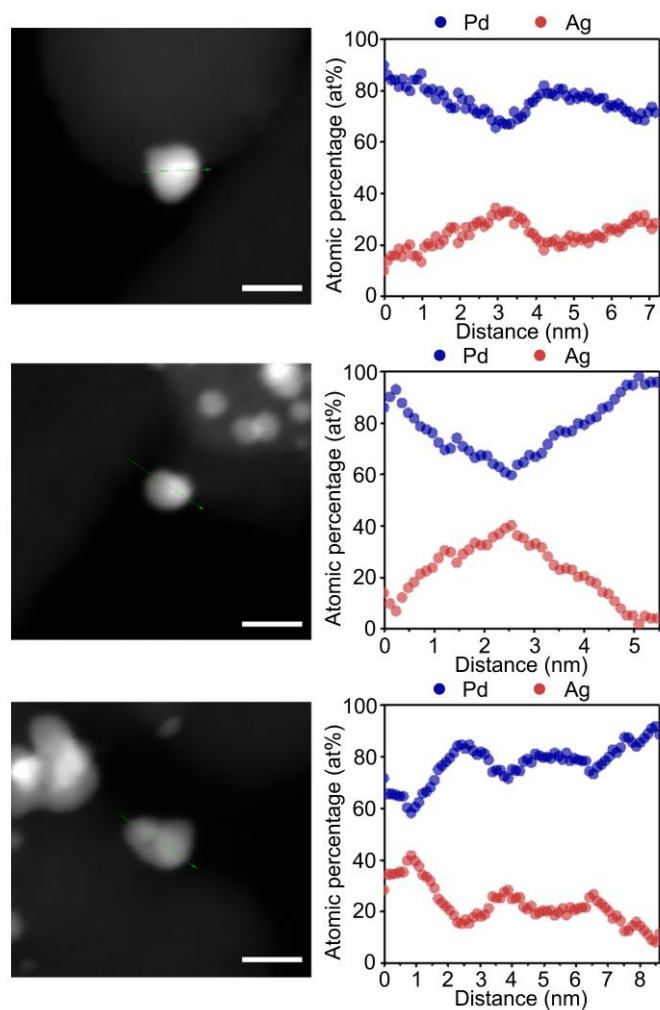

**Supplementary Figure 6** HAADF-STEM images and STEM-EDS line scan profiles of the Pd<sub>80</sub>Ag<sub>20</sub>/C catalysts taken after CV pretreatment. From EDS analysis, the average elemental ratio of Pd:Ag was measured to be 78.2:21.8. Scale bar = 8 nm.

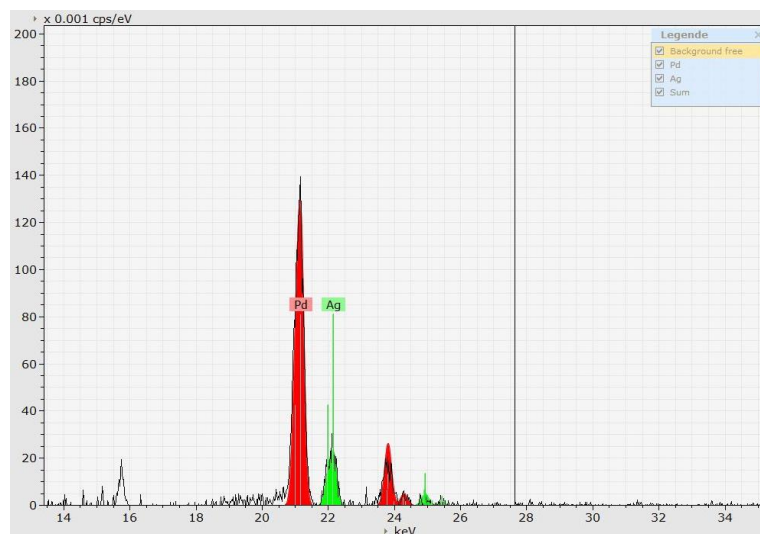

**Supplementary Figure 7** Typical EDS spectrum of the Pd<sub>80</sub>Ag<sub>20</sub>/C catalysts taken after CV pretreatment. The compositional information was obtained from the K $\alpha$  and K $\beta$  lines of Pd and Ag elements to sufficiently separate the EDS signals of Pd and Ag.



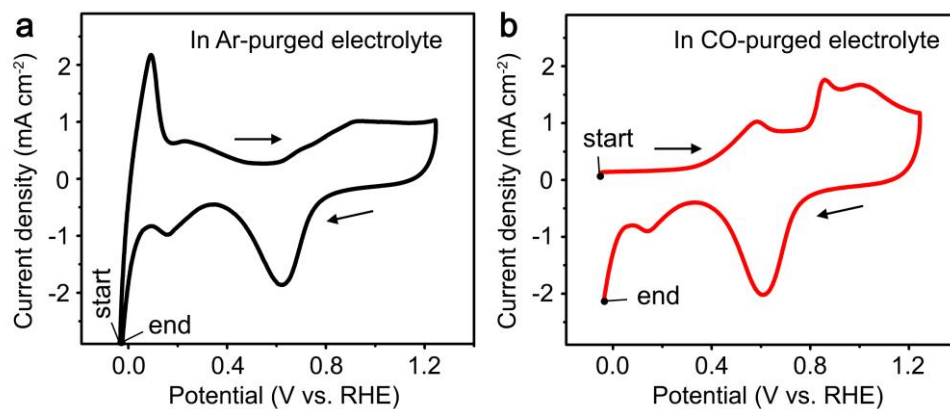

**Supplementary Figure 8** Anodic CV spectra of Pd/C estimated after applying -0.20 V vs. RHE for 6 min in **a** Ar-purged and **b** CO-purged electrolyte. CV scans were conducted at a rate of  $10 \text{ mV s}^{-1}$ . By comparing the CV spectra, it can be identified that three additional peaks centered at approximately 0.60, 0.86 and 1.00 V vs. RHE appear in a CO-purged electrolyte condition.

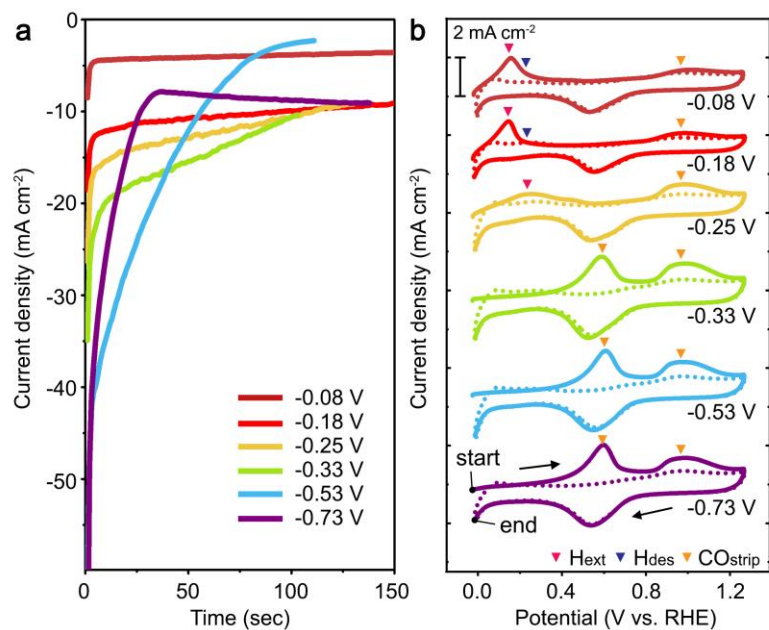

**Supplementary Figure 9** Electrochemical surface analysis of Pd/C catalysts. **a** Current density vs. time curves at various potentials in a CO<sub>2</sub>-saturated electrolyte. **b** CV curves recorded after electrolysis at various potentials. Solid and dotted lines are the first and second cycle of CV curves. In the first cycle, the anodic peaks related with H extraction from the lattice, H desorption from the surface, and CO stripping are indicated with pink, blue, and orange triangles, respectively.

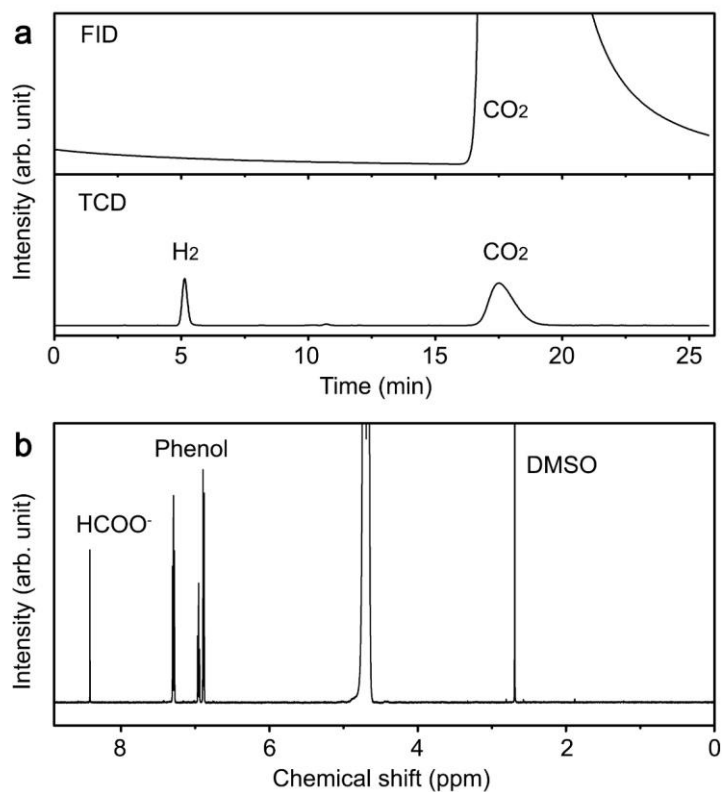

**Supplementary Figure 10** Representative GC and <sup>1</sup>H NMR spectra of gas and liquid products. **a** The GC spectra were obtained by injecting a gas mixture in the headspace of a gas-tight cell after electrolysis at -0.53 V vs. RHE. The H<sub>2</sub> was detected in a TCD whereas CO was detected in an FID. **b** The <sup>1</sup>H NMR spectra were measured using the catholyte after electrolysis at -0.18 V vs. RHE. For <sup>1</sup>H NMR analysis, the catholyte was mixed with the D<sub>2</sub>O solution containing DMSO and phenol as internal standards.

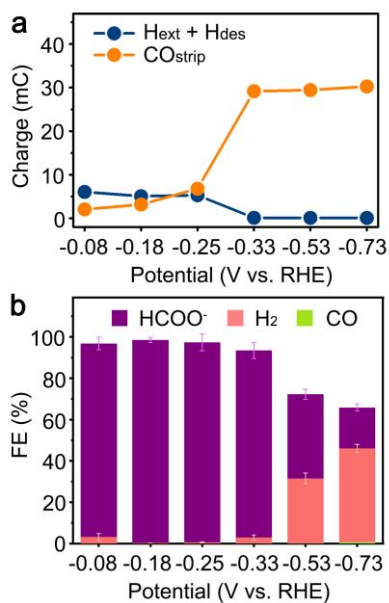

**Supplementary Figure 11** Stripping charges and product selectivity of Pd/C. **a** CO<sub>strip</sub> and H<sub>ext</sub> + H<sub>des</sub> charges measured from the CV curves of Pd/C shown in Supplementary Figure 9b. **b** The FEs for H<sub>2</sub> and HCOO<sup>-</sup> production measured from GC and <sup>1</sup>H NMR analysis after electrolysis on Pd/C at various potentials in a gas-tight cell. Error bars: mean±s.d. Source data are provided as a Source Data file.

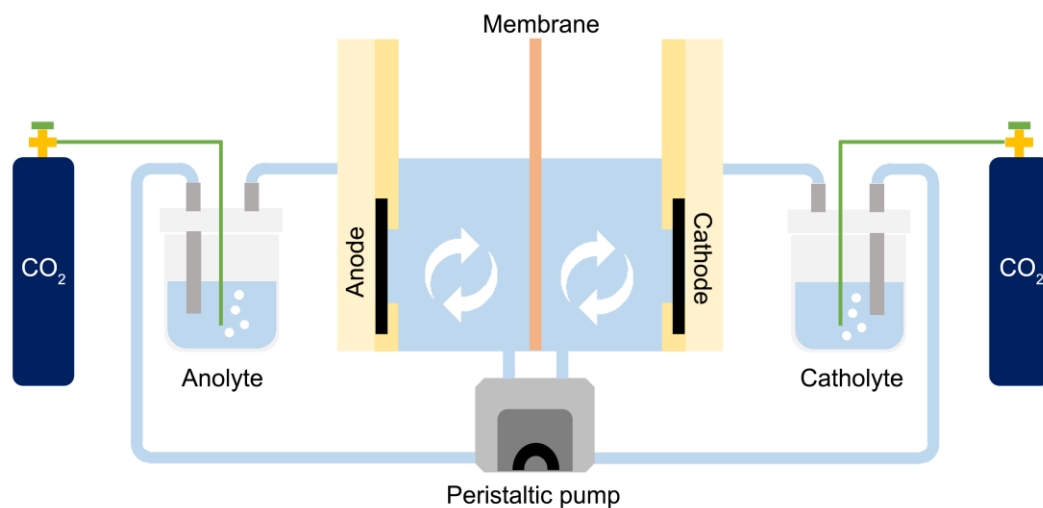

**Supplementary Figure 12** Schematic diagram of a flow cell system composed of an electrochemical cell, a peristaltic pump and electrolyte bottles. The catholyte and anolyte were continuously circulated using a peristaltic pump between the electrolyte bottles and the electrochemical cell. The electrolyte was purged with a high-purity CO<sub>2</sub> gas during electrolysis.

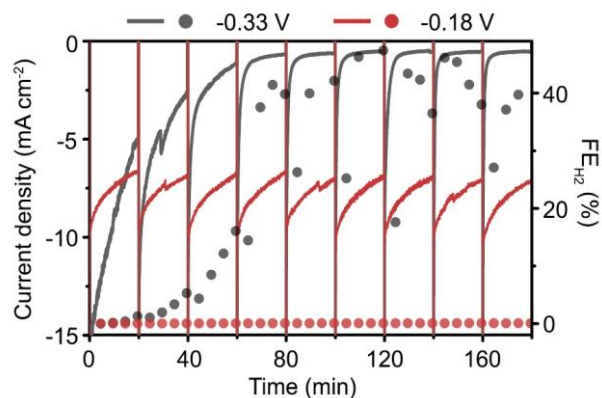

**Supplementary Figure 13** Current density vs. time curves and H<sub>2</sub> production selectivity recorded during cyclic two-step electrolysis with different reduction potentials. In the reduction step, -0.18 or -0.33 V vs. RHE was applied with the reduction period fixed at 19 min 50 s. The oxidation potential and period were fixed at 1.22 V vs. RHE and 10 s, respectively. The experiments were conducted in a flow cell system where CO<sub>2</sub>-saturated bicarbonate solution was continuously refreshed using a peristaltic pump.

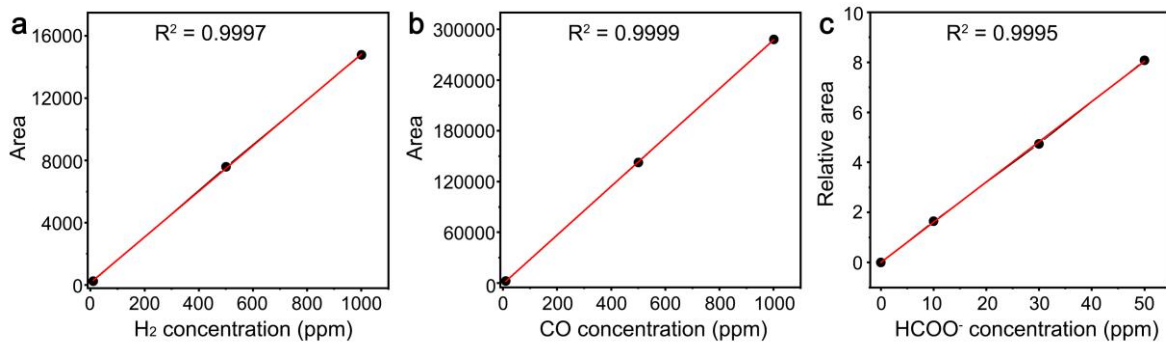

**Supplementary Figure 14** Calibration curves for quantitative analysis. The calibration curves of **a** H<sub>2</sub> and **b** CO are obtained by performing GC analyses using standard gases containing 10, 500 and 1000 ppm of H<sub>2</sub> and CO. **c** The calibration curve of HCOO<sup>-</sup> is obtained by plotting the relative area of HCOO<sup>-</sup> signal respect to phenol as a function of HCOO<sup>-</sup> concentration, after <sup>1</sup>H MMR measurements of the standard samples containing 0, 10, 30 and 50 mM HCOO<sup>-</sup>.

**Supplementary Table 1** ICP-OES analysis result of Pd<sub>80</sub>Ag<sub>20</sub>/C catalysts taken after CV pretreatment.

| <b>Element</b> | <b>Atom%</b> |
|----------------|--------------|
| Pd             | 80.01        |
| Ag             | 19.99        |



**Supplementary Table 2** Summary on FEs for H<sub>2</sub> evolution, CO production, HCOO<sup>-</sup> production, H adsorption/absorption and CO adsorption on Pd<sub>80</sub>Ag<sub>20</sub>/C catalysts. The FEs for H<sub>2</sub>, CO and HCOO<sup>-</sup> production were measured from GC and <sup>1</sup>H NMR analysis after electrolysis at various potentials. The FEs for CO adsorption and H adsorption/absorption were calculated by dividing the CO<sub>strip</sub> and H<sub>ext</sub> + H<sub>des</sub> charges by passed charge, respectively.

| Potential<br>(V vs. RHE) | FE for H <sub>2</sub><br>production<br>(%) | FE for CO<br>production<br>(%) | FE for HCOO <sup>-</sup><br>production<br>(%) | FE for H<br>adsorption/absorption<br>(%) | FE for CO<br>adsorption<br>(%) | Total FE<br>(%) |
|--------------------------|--------------------------------------------|--------------------------------|-----------------------------------------------|------------------------------------------|--------------------------------|-----------------|
| -0.08                    | 1.4                                        | 0.0                            | 95.1                                          | 0.5                                      | 0.3                            | 97.3            |
| -0.18                    | 0.1                                        | 0.0                            | 97.4                                          | 0.5                                      | 0.4                            | 98.4            |
| -0.25                    | 0.2                                        | 0.0                            | 97.4                                          | 1.0                                      | 0.4                            | 99.0            |
| -0.33                    | 0.7                                        | 0.2                            | 94.5                                          | 1.3                                      | 0.5                            | 97.2            |
| -0.53                    | 21.3                                       | 0.2                            | 71.4                                          | 1.1                                      | 2.4                            | 96.4            |
| -0.73                    | 42.7                                       | 0.1                            | 43.5                                          | 0.3                                      | 5.5                            | 92.1            |

**Supplementary Table 3** Reported electrochemical HCOO<sup>-</sup> production performance on Pd-based catalysts. The reported data were extracted or collected from the literature that are listed in the Supplementary References.

| Electrolysis method                         | Catalyst                             | Electrolyte                                         | Potential (V vs. RHE)               | Electrolysis duration | FE <sub>HCOO<sup>-</sup></sub> (%) | Initial current density (mA cm <sup>-2</sup> ) | Final current density (mA cm <sup>-2</sup> ) | Ref      |
|---------------------------------------------|--------------------------------------|-----------------------------------------------------|-------------------------------------|-----------------------|------------------------------------|------------------------------------------------|----------------------------------------------|----------|
| Potentiostatic electrolysis in an H-cell    | Pd/C                                 | 0.5 M NaHCO <sub>3</sub>                            | -0.25                               | 1 h                   | 98.0                               | 4.2                                            | 3.0                                          | 1        |
| Potentiostatic electrolysis in an H-cell    | High-index Pd                        | 0.5 M KHCO <sub>3</sub>                             | -0.20                               | 50 min                | 97.0                               | 20.0                                           | 17.0                                         | 2        |
| Potentiostatic electrolysis in an H-cell    | B-doped Pd/C                         | 0.1 M KHCO <sub>3</sub>                             | -0.50                               | 5 h                   | 55.0                               | 6.5                                            | 3.6                                          | 3        |
| Potentiostatic electrolysis in an H-cell    | 6.5 nm Pd NPs                        | 0.5 M NaHCO <sub>3</sub>                            | -0.20                               | 1 h                   | 94.0                               | 6.0                                            | 2.0                                          | 4        |
| Potentiostatic electrolysis in an H-cell    | Pd <sub>70</sub> Pt <sub>30</sub> /C | pH 6.8 phosphate buffer                             | -0.40                               | 2 h                   | 57.6                               | 7.0                                            | 3.5                                          | 5        |
| Potentiostatic electrolysis in an H-cell    | 3.7 nm Pd NPs                        | 1.0 M KHCO <sub>3</sub>                             | -0.20                               | 1 h                   | 98.0                               | 18.2                                           | 13.9                                         | 6        |
| Potentiostatic electrolysis in an H-cell    | Electrodeposited Pd                  | 0.1 M KHCO <sub>3</sub>                             | -0.40                               | 20 min                | 55.8                               | 2.0                                            | 1.4                                          | 7        |
| Potentiostatic electrolysis in an H-cell    | Pd foil modified by NHC ligand       | 0.5 M KHCO <sub>3</sub>                             | -0.57                               | 6 h                   | <80.0                              | 2.2                                            | 2.0                                          | 8        |
| Potentiostatic electrolysis in an H-cell    | Pd/Pt/C                              | 1.0 M KHCO <sub>3</sub>                             | -0.20                               | 1 h                   | 91.9                               | 29.7                                           | 19.4                                         | 9        |
| Cyclic two-step electrolysis in a flow cell | Pd <sub>80</sub> Ag <sub>20</sub> /C | 0.5 M NaHCO <sub>3</sub> / 0.5 M NaClO <sub>4</sub> | -0.18 V for 590 s / 1.22 V for 10 s | 45 h                  | 97.8                               | 11.0                                           | 11.0                                         | Our work |

## Supplementary References

1. Min, X. & Kanan, M. W. Pd-Catalyzed electrohydrogenation of carbon dioxide to formate: high mass activity at low overpotential and identification of the deactivation pathway. *J. Am. Chem. Soc.* **137**, 4701–4708 (2015).
2. Klinkova, A. *et al.* Rational design of efficient palladium catalysts for electroreduction of carbon dioxide to formate. *ACS Catal.* **6**, 8115–8120 (2016).
3. Jiang, B., Zhang, X.-G., Jiang, K., Wu, D.-Y. & Cai, W.-B. Boosting formate production in electrocatalytic CO<sub>2</sub> reduction over wide potential window on Pd Surfaces. *J. Am. Chem. Soc.* **140**, 2880–2889 (2018).
4. Rahaman, M., Dutta, A. & Broekmann, P. Size-dependent activity of palladium nanoparticles: efficient conversion of CO<sub>2</sub> into formate at low overpotentials. *ChemSusChem* **10**, 1733–1741 (2017).
5. Kortlever, R., Peters, I., Koper, S. & Koper, M. T. M. Electrochemical CO<sub>2</sub> reduction to formic acid at low overpotential and with high Faradaic efficiency on carbon-supported bimetallic Pd-Pt nanoparticles. *ACS Catal.* **5**, 3916–3923 (2015).
6. Gao, D. *et al.* Switchable CO<sub>2</sub> electroreduction via engineering active phases of Pd nanoparticles. *Nano Res.* **10**, 2181–2191 (2017).
7. Zhou, F., Li, H., Fournier, M. & MacFarlane, D. R. Electrocatalytic CO<sub>2</sub> reduction to formate at low overpotentials on electrodeposited Pd Films: stabilized performance by suppression of CO formation. *ChemSusChem* **10**, 1509–1516 (2017).
8. Cao, Z. *et al.* Chelating N-heterocyclic carbene ligands enable tuning of electrocatalytic CO<sub>2</sub> reduction to formate and carbon monoxide: surface organometallic chemistry. *Angew. Chem. Int. Ed.* **57**, 4981–4985 (2018).
9. Cai, F. *et al.* Effect of metal deposition sequence in carbon-supported Pd–Pt catalysts on activity towards CO<sub>2</sub> electroreduction to formate. *Electrochem. Commun.* **76**, 1–5 (2017).
